# Supplementary material
Source: PubMed Central journal article supplement (PMC4119885)
Supplement: NIHMS585104-supplement-Supp.pdf [file NIHMS585104-supplement-Supp.pdf]

# THE LANCET

## **Supplementary appendix**

This appendix formed part of the original submission and has been peer reviewed. We post it as supplied by the authors.

Supplement to: Mohr JP, Parides MK, Stapf C, et al for the international ARUBA investigators. Medical management with or without interventional therapy for unruptured brain arteriovenous malformations (ARUBA): a multicentre, non-blinded, randomised trial. *Lancet* 2013; published online Nov 20. [http://dx.doi.org/10.1016/S0140-6736\(13\)62302-8](http://dx.doi.org/10.1016/S0140-6736(13)62302-8).

**A Randomized trial of Unruptured Brain AVMs (ARUBA)  
Supplementary web material**

**TABLE OF CONTENTS**

|                                               |          |
|-----------------------------------------------|----------|
| <b>International ARUBA Investigators.....</b> | <b>2</b> |
| <b>Enrollment criteria.....</b>               | <b>3</b> |
| <b>Supplementary Table S1 .....</b>           | <b>4</b> |
| <b>Supplementary Table S2 .....</b>           | <b>5</b> |
| <b>Supplementary Figure S1 .....</b>          | <b>6</b> |
| <b>Supplementary Figure S2 .....</b>          | <b>7</b> |
| <b>Supplementary Figure S3 .....</b>          | <b>8</b> |

## International ARUBA Investigators

### Executive Committee

J.P. Mohr, MS, MD  
 Alan.J. Moskowitz, MD  
 Ellen. Moquete, RN  
 Claudia S. Moy, PhD  
 Michael K. Parides, PhD  
 Rustam Al-Shahi Salman, PhD  
 Christian Stapf, MD  
 Eric Vicaut, MD, PhD  
 William L Young, MD, PhD (deceased)

### Coordinating Centers

- Clinical Coordinating Center (CCC)  
 ARUBA–West: J.P. Mohr (Director), S. Marshall (deceased), N. Ostapkovich, K. Lord,  
 ARUBA–Europe: C. Stapf (Director), C. Buchbinder
- Data Coordinating Center (DCC)  
 ARUBA–West: A.J. Moskowitz (Director), M.K. Parides (Co–Director), E. Moquete, K. McDonald, A.  
 Estevez, S. Varghese, J.R. Overbey, E. Kumbarce, J. Foo  
 ARUBA–Europe: E. Vicaut (Director), A. Chamam, M. Courrèges–Viaud, C. Dert, U. Fiedler, V. Jouis, S.  
 Kabla, S. Marchand, A. Pena, V. Rochaud

### Data Safety Monitoring Board (DSMB)

|                                                |                          |
|------------------------------------------------|--------------------------|
| Karen Furie, MD, MPH (chair)                   | Neurology                |
| Barry R. Davis, MD, PhD                        | Statistics               |
| Michael D. Hill, MD, MSc                       | Neurology                |
| Charles Jungreis, MD                           | Interv. Neuroradiology   |
| Renee Martin, PhD                              | Statistics               |
| Duke Samson, MD                                | Neurosurgery             |
| Peter R. Gilbert, ScM                          | DSMB contact (NIH/NINDS) |
| <u>Safety Oversight:</u><br>Anthony Furlan, MD | Safety Monitor           |

### Funding Agency

C.S. Moy, PhD (Project Scientist); L.S. Janis, PhD (Program Official); P.R. Gilbert, Sc.M. (DSMB Liaison);  
 National Institutes of Health/National Institute of Neurological Disorders and Stroke (NIH/NINDS), Bethesda, MD,  
 USA

### Adjudication Committees

- Event adjudication  
 Marie–Germaine Bousser, MD, PhD      Neurological AEs, Death  
 Louis R. Caplan, MD, MS      Neurological AEs, Death  
 Charles Strother, MD      Neurological AEs, Death  
 Brice A.K. Weir, MD      Neurological AEs, Death  
 Hans–Martin Schneble, MD      Non–neurological AEs
- Imaging adjudication  
 Aman Patel, MD      Imaging adjudication  
 Phil M. Meyers, MD      Imaging adjudication  
 John Pile–Spellman, MD      Imaging adjudication

**Centre Investigators**

(numbers are patients recruited per country and site)

**ARUBA–Europe****France (79):**

APHP – Hôpital Lariboisière, Paris (35): E.Houdart (PI), D.Bresson, B.George, J.P.Saint–Maurice, C.Stapf.  
 CHRU Roger Salengro, Lille (24): J.P.Lejeune (PI), P.Aguettaz, S.Blond, C.Cordonnier, X.Leclerc, C.Rossi  
 CHRU Besançon (11) : A.Biondi (PI), R.Billon–Grand, T.Moulin  
 CHU Pellegrin, Bordeaux (7): X.Barreau (PI), C.Marchal, V.Michel, A.Thévenoux, I.Tedeschi  
 CHU Brest (1): S.Timsit (PI), P.Dam–Hieu, P.Meriot, F.M.Merrien, A.S.Nedelec, M.Nonent  
 Hôpital Saint Anne, Paris (n=1): F.Nataf (PI), D.Calvet, E.Touzé, D.Trystram

**Germany (51):**

Uniklinik Dresden (12): R.von Kummer (PI), M.Baumann, U.Bodechtel, I.Dzialowski, H.Hentschel, J. Kepplinger, V.Pütz, G.Schackert, K.Wartenberg  
 Charité, Campus Benjamin Franklin, Berlin and Klinikum Frankfurt/Oder (12): A.Hartmann (PI), T.Funk, A.Schilling, R.Wurm  
 Uniklinik Frankfurt/Main (10): J.Berkefeld (PI), H.Braun, M.W.Lorenz, I.Santos, V.Seifert, R.Wolff  
 BG–Kliniken Bergmannstrost, Halle/Saale (3): J.Meisel (PI), E.Herrmann, C.Hohaus, Y.Minkus  
 Uniklinik München–Grosshadern (2): M.Dichgans (PI), H.Brueckmann, A.Dörr, G.Fesl, A.Muacevic, C.Schichor, F.Wollenweber, B.M.Wowra, A.Zollver,  
 Uniklinik Freiburg (2): M.Schumacher (PI), U.Bergmann, C.Hader, W.D.Niesen, C.Taschner, V.Velthoven–Wurster  
 Uniklinik Essen (1): I.Wanke (PI), S.Hagedorn, O.Kastrup, I.Sandalcioglu, U.Sure

**The Netherlands (12):**

UMC Utrecht (9): H.B.van der Worp (PI), C.J.M. Klijn, J.W.Berkelbach van der Sprenkel, T.H.Lo  
 UMC Groningen (3): J.M.C. van Dijk (PI), O.Eshghi, G.J.Luijckx

**Switzerland (1):**

Inselspital Bern (1): M.Arnold (PI), A.Raabe, G.Schroth, M.Heldner, M.Reinert

**United Kingdom (25):**

Western General Hospital, Edinburgh (12): R. Al–Shahi Salman (PI), B.Colam, S.Erridge, R.Sellar, J.Steers, P.M.White  
 Royal Hallamshire Hospital, Sheffield (8): K.Harkness (PI), S.Coley, T.Hodgeson, E.Richards, U.Patel  
 Newcastle General Hospital (2): A.D.Mendelow (PI), A.Gholkar, P.Mitchell, B.Gregson  
 The Walton Centre for Neurology & Neurosurgery, Liverpool (n=2): H.Nahser, M.Javadpour, P.Enevoldson, R.White  
 Salford Royal NHS (n=1): J.Molloy (PI), D.Hughes, C.Sherrington.

**ARUBA–West****Brazil (12):**

Hospital de Clinicas de Porto Alegre (14) : M.A.Stefani (PI), M.L.Fagundes Chaves, A.Finkelsztejn.

**Canada (8):**

CHUM Notre Dame Hospital, Montreal (6): D.Roy (PI), J.Raymond, F.Guilbert  
 University of Alberta (1): T.Darsaut (PI), K.Butcher  
 Hamilton Health Sciences, Hamilton, Ontario (1): J.Silva (PI), P.Klurfan

**South Korea (2):**

Seoul National University Hospital, Seoul (2): Byung–Woo Yoon (PI), J.A.Kim, S.Jung, Y.Kim, C.Kim

**United States (42):**

North Shore–Long Island Jewish Medical Center, New Hyde Park, NY (7): R.Libman (PI), D.J.Langer

Columbia University Medical Center, New York, N.Y. (6): Mohr, J.P. (PI), T.Kitago

UCSF, San Francisco, CA (4): Young, W.L. (PI), M.T.Lawton, R.Higashida, S.C.Johnston

Kaiser Permanente, Los Angeles, CA (4): L.Feng (PI), J.Chen,Z. Ajani, S.Potrebic

Winthrop University Hospital, Mineola, NY (4): E.Wirkowski (PI), J.Pile–Spellman, M.Brisman, J.Jasen

Hartford Hospital, West Hartford, CT (3): I.Kureshi (PI), G.Spiegel, I.Silverman

University of Miami, Coral Gables, FL (3): S.Koch (PI), R.L.Sacco

Rush University, Chicago, IL (3): M.Chen (PI), V.Lee, S.Prabhakaran

University of Alabama at Birmingham, Birmingham, AL (3): M.Harrigan(PI), J.Brockington

University of South Alabama, Mobile, AL (1): R.M.Zweilfer (PI), J.I.Lopez

Loyola University Stritch School of Medicine, Maywood, IL (2): J.Biller (PI), M.Schneck, D.Anderson

Kaiser Permanente, Redwood City, CA (1): S.Cullen (PI), V.Rao, N.Moayeri, V.Tse

John P. Murtha Neuroscience and Pain Institute, Johnstown, PA (1): A.P.Bowles Jr (PI), K.Nassr

**Enrollment Criteria**Inclusion Criteria

1. Patient must have unruptured BAVM diagnosed by MRI/MRA, CTA and/or angiogram
2. Patient is 18 years of age or older
3. Patient has signed Informed Consent and Release of Medical Information and Health Insurance Portability and Accountability Act (HIPPA, US-only) Forms

Exclusion Criteria

1. Patient has BAVM presenting with evidence of recent or prior hemorrhage
2. Patient has received prior BAVM therapy (endovascular, surgical, radiotherapy)
3. Patient has BAVM deemed untreatable by local team, or has concomitant vascular or brain disease that interferes with/or contraindicates any interventional therapy type (stenosis/occlusion of neck artery)
4. Patient has baseline Rankin of  $\geq 2$
5. Patient has concomitant disease/ life expectancy to less than 10 years
6. Patient has thrombocytopenia ( $<100,000/\mu\text{L}$ )
7. Patient has uncorrectable coagulopathy (INR $>1.5$ )
8. Patient is pregnant or lactating
9. Patient has known allergy against iodine contrast agents
10. Patient has known multiple-foci BAVMs
11. Patient has any form of arteriovenous or spinal fistulas
12. Patient has a diagnosed Vein of Galen type malformation
13. Patient has a diagnosed cavernous malformation
14. Patient has a diagnosed dural arteriovenous fistula
15. Patient has a diagnosed developmental venous anomaly
16. Patient has a diagnosed neurocutaneous syndrome such as cerebro-retinal angiomas (von Hippel-Lindau), encephalo-trigeminal syndrome (Sturge-Weber), or Wyburn-Mason syndrome
17. Patient has diagnosed BAVMs in context of moya-moya-type changes
18. Patient has diagnosed hereditary hemorrhagic telangiectasia (Rendu-Osler-Weber)

**Supplementary Table S1**

Synopsis of baseline characteristics of ARUBA patients and those diagnosed with an unruptured bAVM in two large population-based cohorts.

|                                      | <b>ARUBA<br/>(N=223)</b> | <b>Scotland<sup>1</sup><br/>(N=114)</b> | <b>Finland<sup>2</sup><br/>(N=187)</b> | <b>P</b> |
|--------------------------------------|--------------------------|-----------------------------------------|----------------------------------------|----------|
| <b>Demographics</b>                  |                          |                                         |                                        |          |
| Age (years)                          | 44 (±12)                 | 47 (±14)                                | 36 (±15)                               | <0.0001  |
| Female gender                        | 93 (41%)                 | 48 (42%)                                | 80 (43%)                               | 0.98     |
| <b>Clinical Presentation</b>         |                          |                                         |                                        |          |
| Seizure                              | 95 (43%)                 | 58 (51%)                                | n.a.                                   | 0.15     |
| Asymptomatic                         | 94 (42%)                 | 44 (39%)                                | n.a.                                   | 0.53     |
| <b>Modified Rankin Score</b>         |                          |                                         |                                        |          |
| mRS 0                                | 107 (48%)                | 14 (12%)                                | n.a.                                   | <0.0001  |
| mRS 1                                | 116 (53%)                | 71 (63%)                                | n.a.                                   | 0.07     |
| <b>bAVM Morphology</b>               |                          |                                         |                                        |          |
| † bAVM size <3cm                     | 138 (62%)                | 47 (41%)                                | 41 (22%)*                              | <0.0001  |
| Lobar AVM location, any              | 203 (91%)                | n.a.                                    | 137 (73%)                              | <0.0001  |
| Infratentorial AVM location          | 12 (5%)                  | n.a.                                    | 10 (5%)                                | 0.98     |
| ‡ Eloquent AVM location              | 105 (47%)                | 58 (51%)                                | n.a.                                   | 0.51     |
| Spetzler-Martin grade 1              | 65 (29%)                 | 21 (18%)                                | 13 (7%)                                | <0.0001  |
| Spetzler-Martin grade 2              | 71 (32%)                 | 27 (24%)                                | 15 (27%)                               | <0.0001  |
| Spetzler-Martin grade 3              | 63 (28%)                 | 19 (17%)                                | 61 (33%)                               | 0.0097   |
| Spetzler-Martin grade 4              | 23 (10%)                 | 11 (10%)                                | 46 (25%)                               | <0.0001  |
| Spetzler-Martin grade 5              | 0                        | 1 (1%)                                  | 14 (8%)                                | <0.0106  |
| <b>Concurrent Arterial Aneurysms</b> |                          |                                         |                                        |          |
| § Associated aneurysm, any           | 36 (16%)                 | 23 (20%)                                | 24 (13%)                               | 0.24     |
| Unrelated aneurysm, any              | 11 (5%)                  | 11 (10%)                                | n.a.                                   | 0.10     |
| <b>Venous Drainage Pattern</b>       |                          |                                         |                                        |          |
| Superficial only                     | 147 (66%)                | 66 (58%)                                | 102 (55%)                              | 0.06     |
| Any deep                             | 75 (34%)                 | 48 (42%)                                | 82 (44%)                               | 0.08     |

Data are mean (SD) or number (%); n.a. = not available in published source; \*Dataset available for bAVM size <25mm only

**Table 4a** Secondary analysis of primary endpoint event rates by Spetzler Martin grade and treatment allocation (by randomization assignment)

| Spetzler–Martin grade* | Interventional Therapy (IT)<br>(n=114) |                        | Medical Management (MM)<br>(n=109) |                        | P       |
|------------------------|----------------------------------------|------------------------|------------------------------------|------------------------|---------|
|                        | N patients                             | N patients with events | N patients                         | N patients with events |         |
| I                      | 32                                     | 2 (6.3%)               | 33                                 | 4 (12.1%)              | 0.42    |
| II                     | 44                                     | 15 (34.1%)             | 27                                 | 2 (7.4%)               | 0.0105  |
| III                    | 28                                     | 16 (57.1%)             | 34                                 | 3 (8.8%)               | <0.0001 |
| IV                     | 8                                      | 2 (25%)                | 15                                 | 2 (13.3%)              | 0.48    |

**Table 4b** Secondary analysis of primary endpoint event rates by Spetzler Martin grade and treatment allocation (as treated)

| Spetzler–Martin grade* | Interventional Therapy (IT)<br>(n=98) |                        | Medical Management (MM)<br>(n=125) |                        | P       |
|------------------------|---------------------------------------|------------------------|------------------------------------|------------------------|---------|
|                        | N patients                            | N patients with events | N patients                         | N patients with events |         |
| I                      | 28                                    | 4 (14.3%)              | 37                                 | 2 (5.4%)               | 0.22    |
| II                     | 37                                    | 16 (43.3%)             | 34                                 | 1 (2.9%)               | <0.0001 |
| III                    | 28                                    | 16 (57.1%)             | 34                                 | 3 (8.8%)               | <0.0001 |
| IV                     | 5                                     | 0 (0%)                 | 18                                 | 4 (22.2%)              | 0.25    |

Data are number of patients (%).

\* Baseline SM not available for 2 patients as they did not have diagnostic angiography at enrolment



**Supplementary Figure S1**

Aggregate Subject enrollment between April 2007 and February 2013 when database was frozen for interim analysis

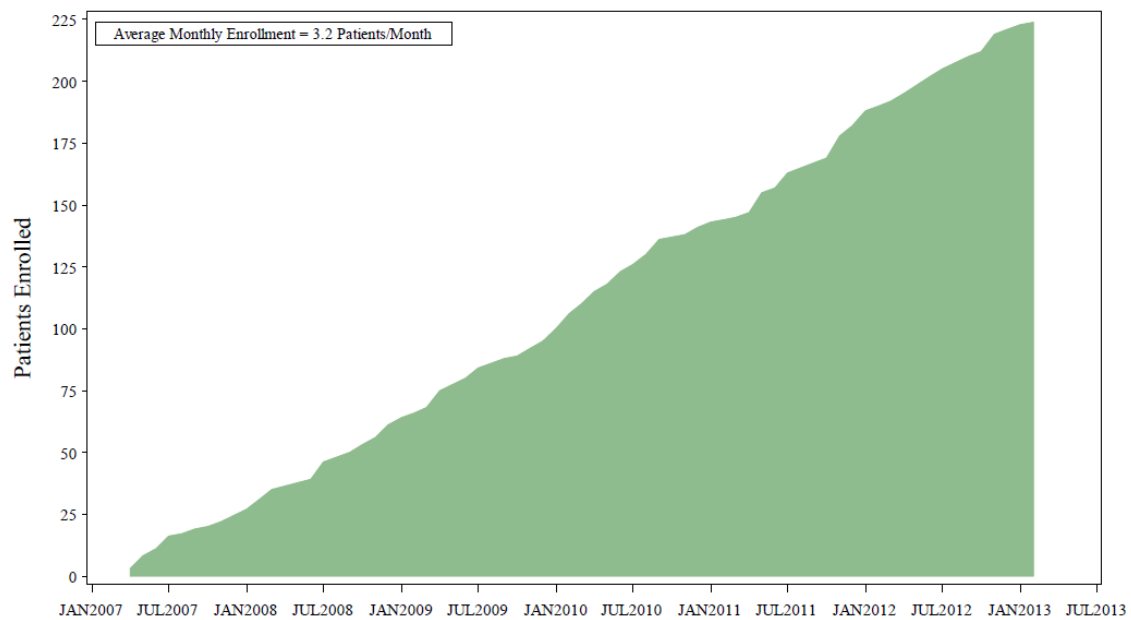

**Supplementary Figure S2**  
Time to first interventional treatment event

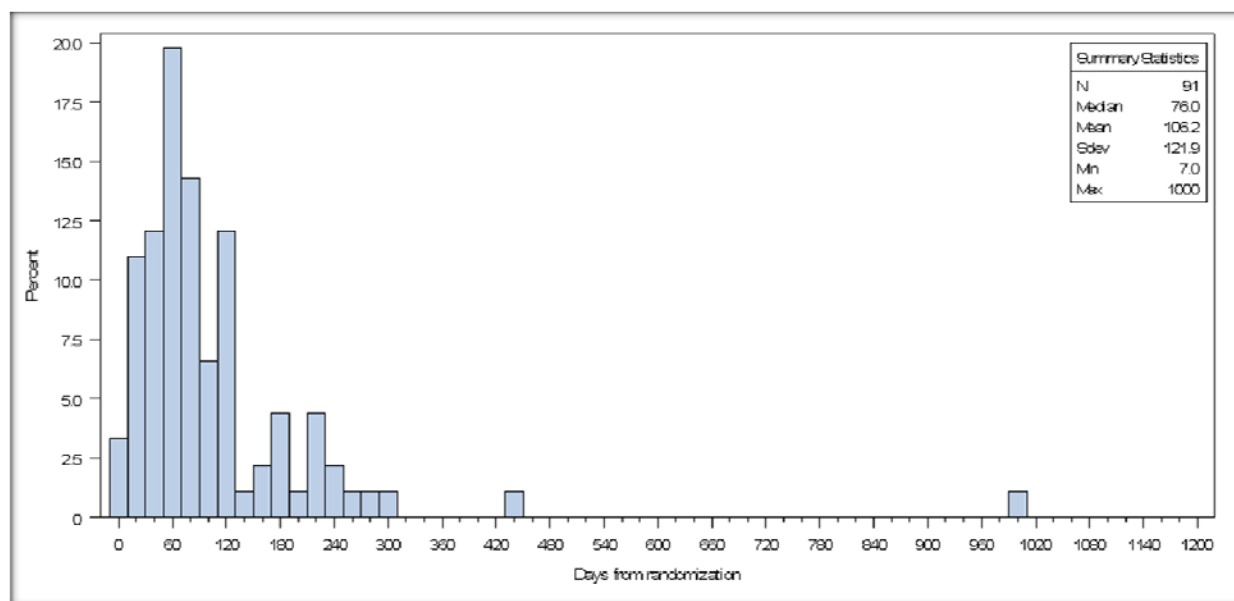

**Supplementary Figure S3**

Incidence rate ratio of primary outcome events (death or stroke) by country.

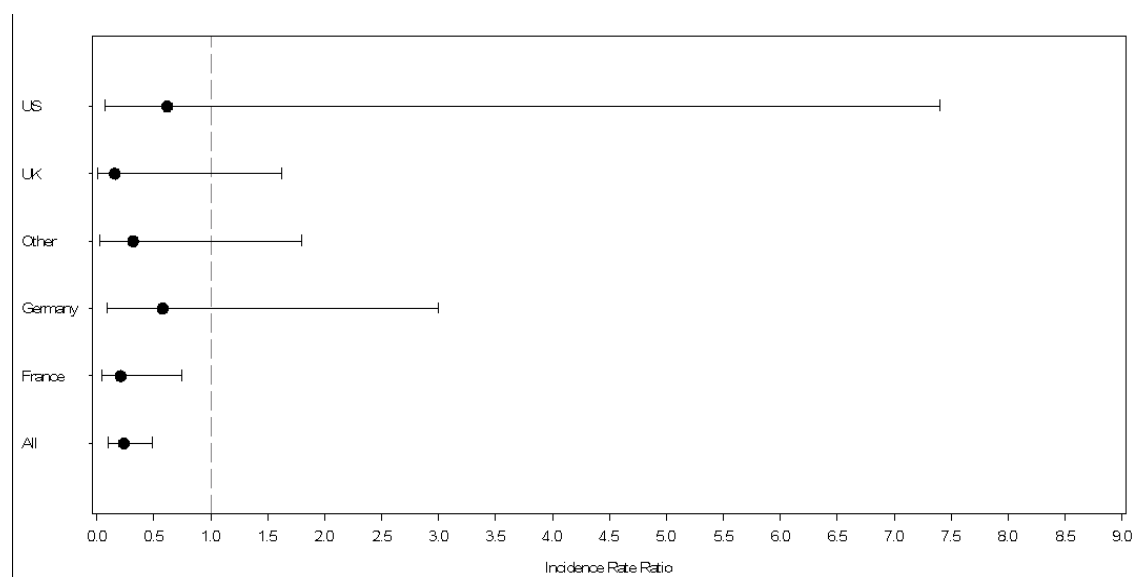

Incident rate ratios are given with 95% confidence intervals.

Countries contributing less than 15 patients are listed among "other".

**Supplement References**

<sup>1</sup> Wedderburn CJ, van Beijnum J, Bhattacharya JJ, Counsell CE, Papanastassiou V, Ritchie V, Roberts RC, Sellar RJ, Warlow CP, Al-Shahi Salman R, SIVMS Collaborators. Outcome after interventional or conservative management of unruptured brain arteriovenous malformations: a prospective, population-based cohort study. *Lancet Neurol.* 2008;7:223-30.

<sup>2</sup> Laakso A, Dashti R, Seppänen J, Juvola S, Väärt K, Niemelä M, Sankila R, Hernesniemi JA. Long-term excess mortality in 623 patients with brain arteriovenous malformations. *Neurosurgery.* 2008;63:244-53.
